# Supplementary material
Source: Springer Nature journal article supplement (https://www.springermedizin.de/resource/supplementary/12884_2012_577_MOESM1_ESM.pdf/9458050)
Supplement: MOESM1 [file 9458050]

| Have you ever been pressured or forced to have sexual relations? (Tick off one or several boxes) |                           |                                |                          |
|--------------------------------------------------------------------------------------------------|---------------------------|--------------------------------|--------------------------|
| Answering options for all versions of Q1 except the first (76 948 women)                         |                           |                                |                          |
|                                                                                                  | In this pregnancy         | Last 6 months before pregnancy | Earlier                  |
| No, never.....                                                                                   | <input type="checkbox"/>  | <input type="checkbox"/>       | <input type="checkbox"/> |
| Yes, pressured.....                                                                              | <input type="checkbox"/>  | <input type="checkbox"/>       | <input type="checkbox"/> |
| Yes, forced with violence.....                                                                   | <input type="checkbox"/>  | <input type="checkbox"/>       | <input type="checkbox"/> |
| Yes, raped.....                                                                                  | <input type="checkbox"/>  | <input type="checkbox"/>       | <input type="checkbox"/> |
| Have you ever been pressured or forced to have sexual relations? (Fill in one or several boxes)  |                           |                                |                          |
| Answering options to the first version of Q1 (1712 women )                                       |                           |                                |                          |
|                                                                                                  | During the last 12 months |                                | Earlier                  |
| No, never.....                                                                                   | <input type="checkbox"/>  |                                | <input type="checkbox"/> |
| Yes, pressured.....                                                                              | <input type="checkbox"/>  |                                | <input type="checkbox"/> |
| Yes, forced with violence.....                                                                   | <input type="checkbox"/>  |                                | <input type="checkbox"/> |
| Yes, raped.....                                                                                  | <input type="checkbox"/>  |                                | <input type="checkbox"/> |
